# Supplementary material for: Coupling interaction of cathodic reduction and microbial metabolism in aerobic biocathode of microbial fuel cell
Source: Royal Society of Chemistry journal article supplement (doi:10.1039/c4ra03441d), 2014-01-01
Supplement: c4ra03441d1.pdf [file c4ra03441d1.pdf]

*Supporting Information for*

**Coupling Interaction of Oxygen Reduction and Nitrification in Nitrifying**

**Biocathode Microbial Fuel Cell**

*Yue Du, <sup>a</sup> Yujie Feng, <sup>a</sup> \* Yue Dong, <sup>a</sup> Youpeng Qu, <sup>b</sup> Jia Liu, <sup>a</sup> Xiangtong Zhou, <sup>a</sup>*

*Nanqi Ren <sup>a</sup>*

*<sup>a</sup> State Key Laboratory of Urban Water Resource and Environment, Harbin Institute of Technology, No. 73 Huanghe Road, Harbin 150090, China*

*<sup>b</sup> School of Life Science and Technology, Harbin Institute of Technology, No. 2 Yikuang Street, Nangang District, Harbin 150080, China*

*\* Corresponding author. Fax: 86-451-86287017; Tel.: 86-451-86287017. E-mail address: yujief@hit.edu.cn*

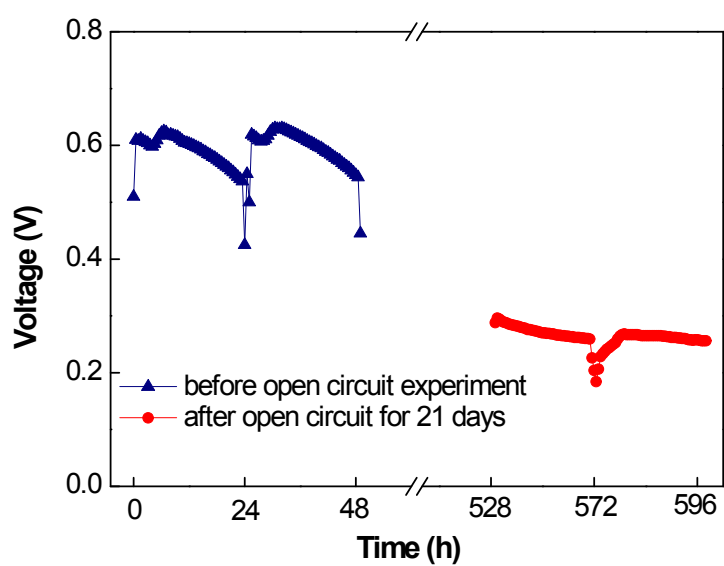

**Fig. S1.** Voltage generation of nitrifying MFC before open circuit experiment and after open circuit for 21 days.
